# Supplementary material for: Calling Cards enable multiplexed identification of the genomic targets of DNA-binding proteins
Source: HighWire-hosted journal article supplement (doi:10.1101/gr.114850.110), 2011-04-06
Supplement: SupplementaryFigures_Wang.pdf [file SupplementaryFigures_Wang.pdf]

## Supplementary figures

**A**

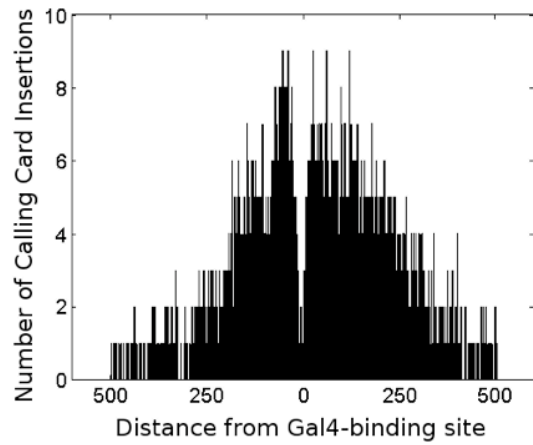

**B**

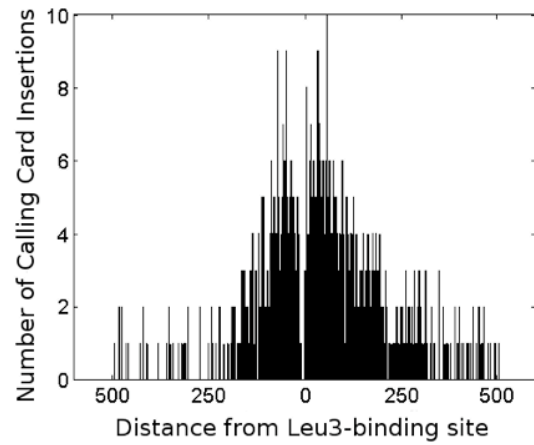

**Supplementary Figure 1.** The frequency of Calling Card insertions is plotted as a function of distance from known binding sites of Gal4 (A) and Leu3 (B). More than 60% TF-directed insertions occur within 100 base-pairs of known TF binding sites.

Gal4

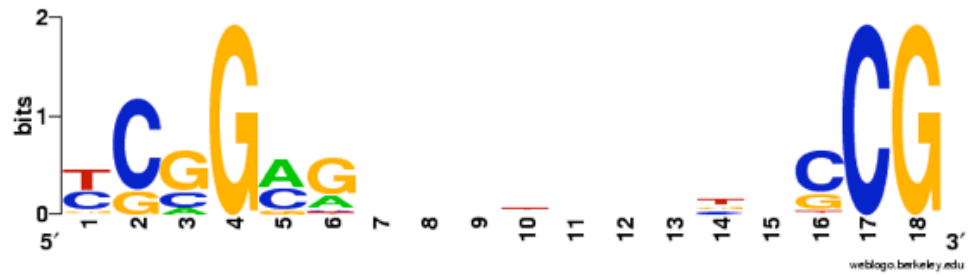

Gcn4

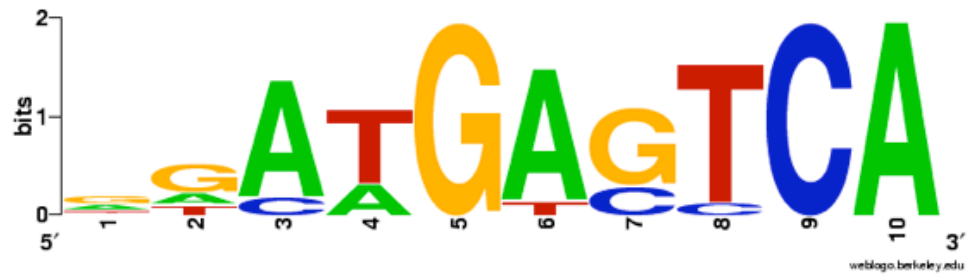

Leu3

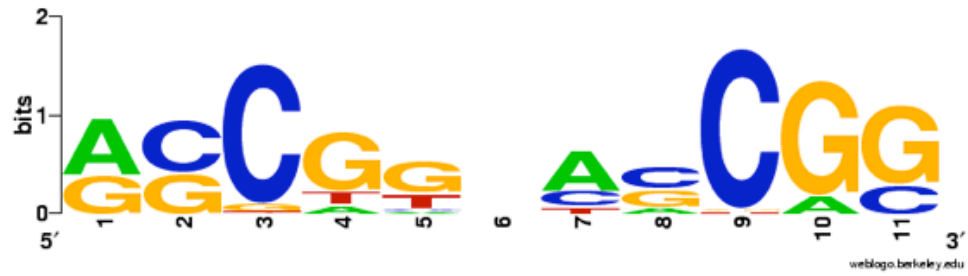

**Supplementary Figure 2.** Sequence logos for binding site motifs of Gal4, Gcn4, and Leu3 identified using Calling Card method.

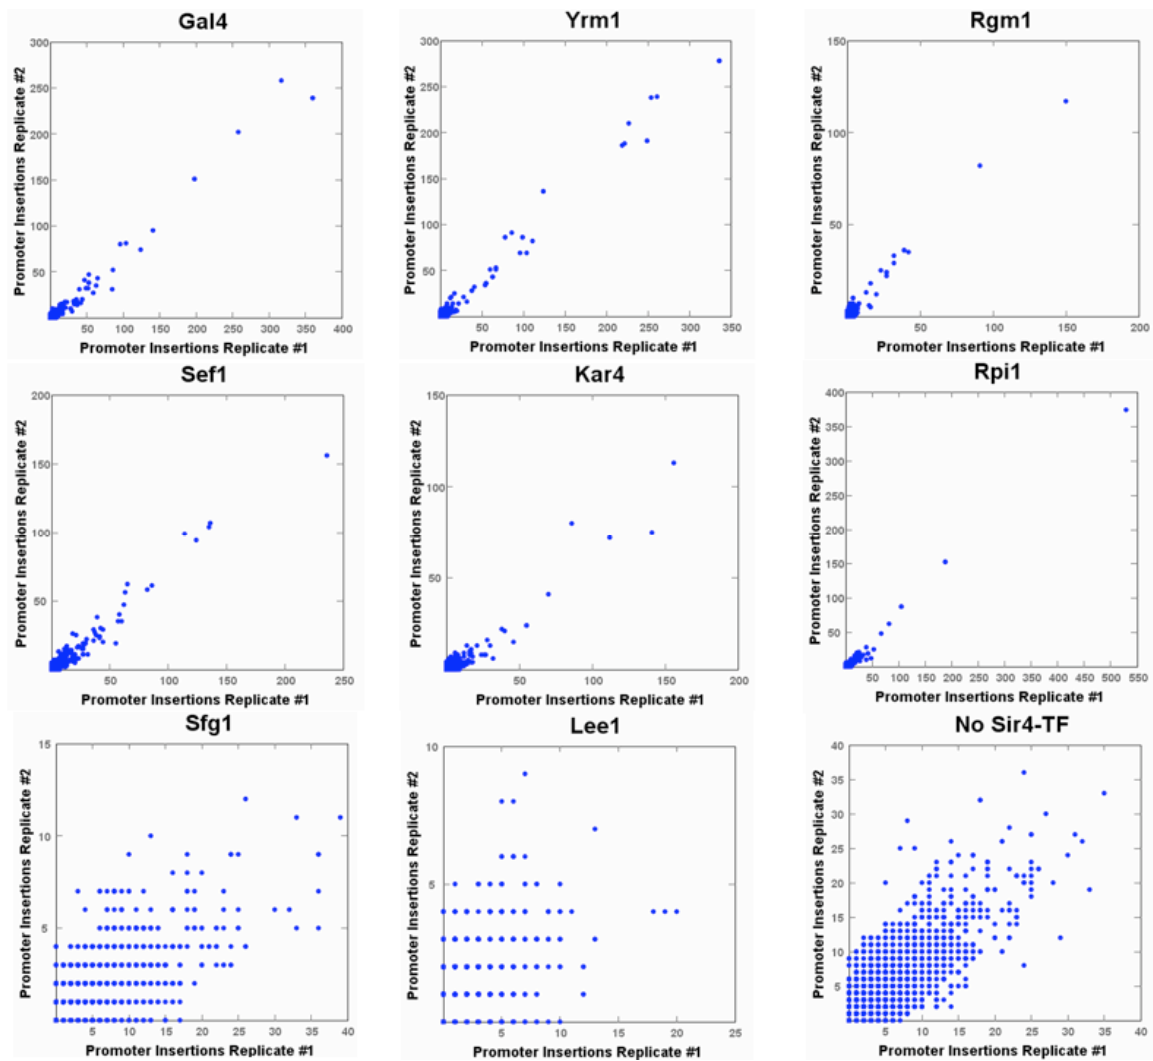

**Supplementary Figure 3.** The number of independent Calling Cards insertions within each promoter is plotted for two biological replicates multiplexing eight TFs. The no-TF negative control is also included.

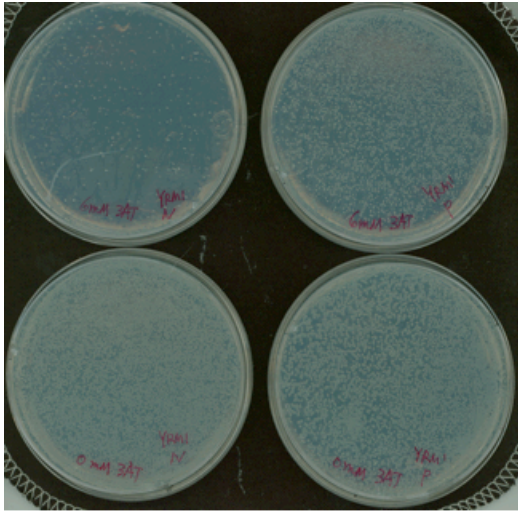

**Yrm1**

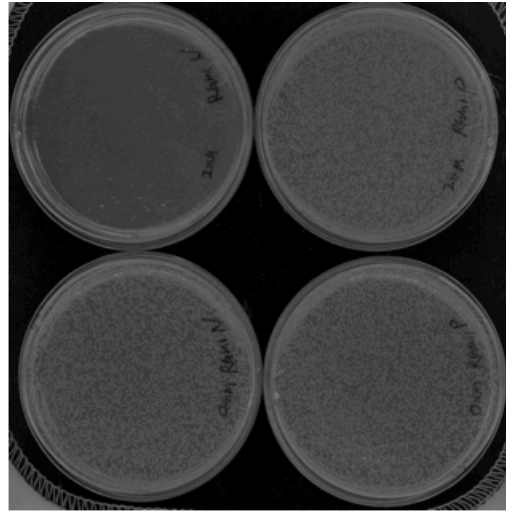

**Rgm1**

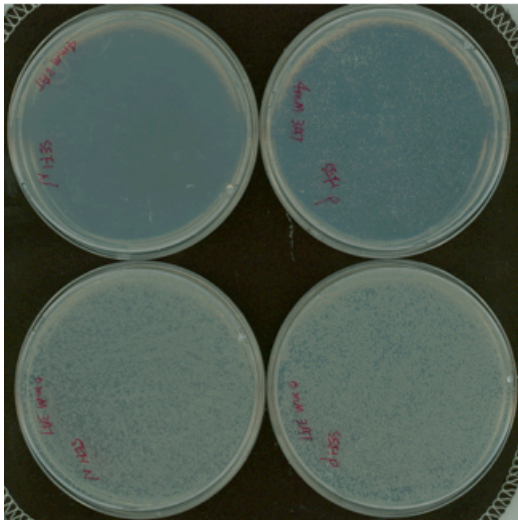

**Sef1**

| Negative reporter | Positive reporter | 2-6mM 3-AT |
|-------------------|-------------------|------------|
| Negative reporter | Positive reporter | No 3-AT    |

**Supplementary Figure 4.** The binding motifs of Yrm1, Sef1, and Rgm1 are verified using bacteria one hybrid.

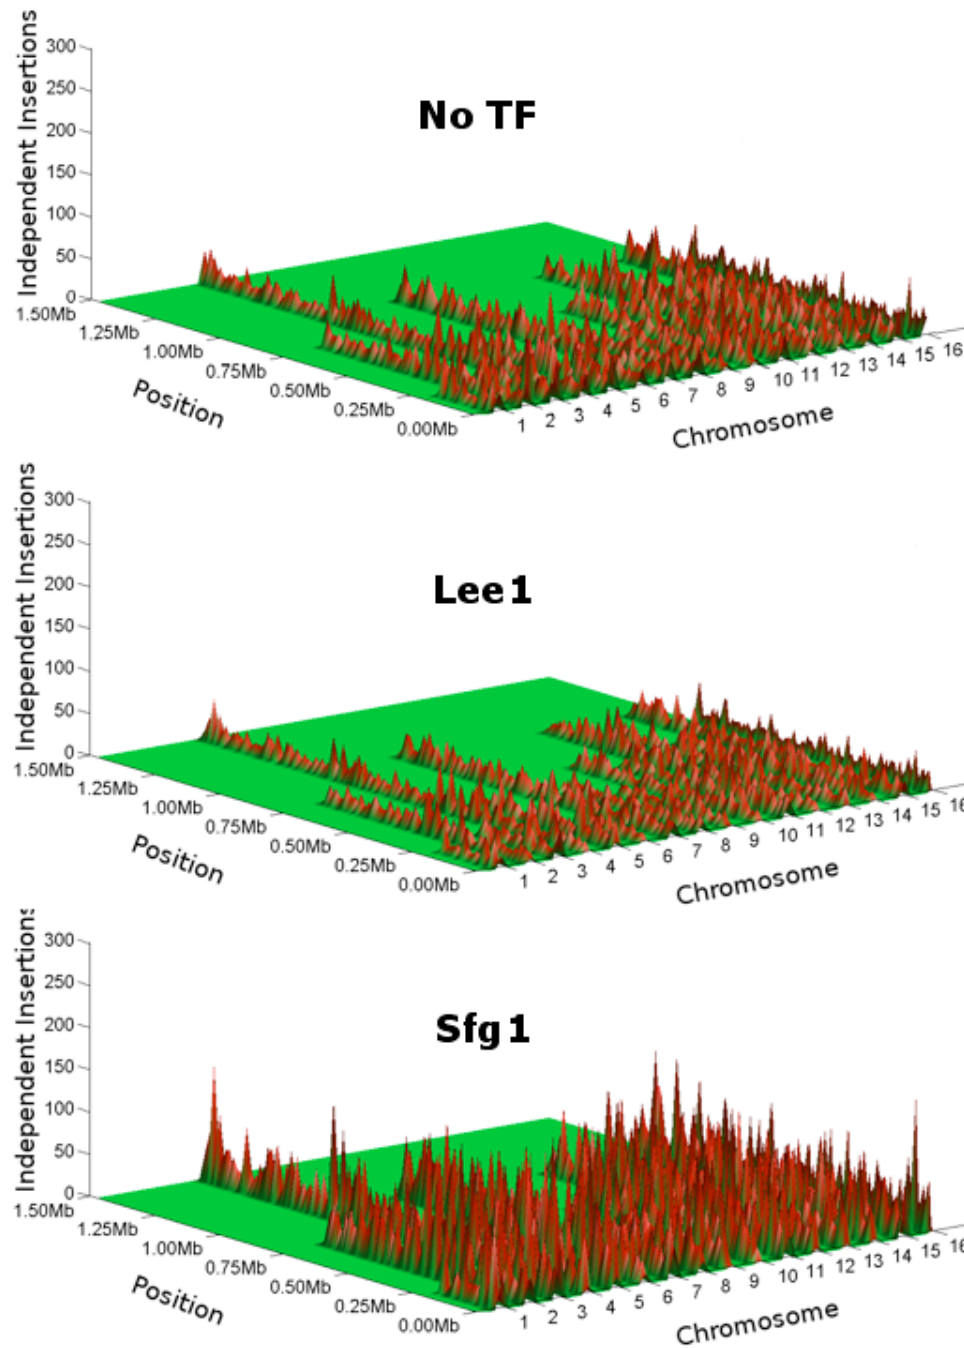

**Supplementary Figure 5.** Genome-wide Calling Card insertion patterns of Lee1 and Sfg1 are very similar to no TF control.
